# Supplementary material for: On mode water formation and erosion in the Arabian Sea: forcing mechanisms, regionality, and seasonality
Source: Copernicus journal article supplement (doi:10.5194/os-21-1349-2025), 2025-07-14
Supplement: Supplementary file 1 [file os-21-1349-2025-supplement.pdf]

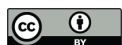

*Supplement of*

## **On mode water formation and erosion in the Arabian Sea: forcing mechanisms, regionality, and seasonality**

**Estel Font et al.**

*Correspondence to:* Estel Font (estel.font.felez@gu.se)

The copyright of individual parts of the supplement might differ from the article licence.

**Content:** Supplementary Figures S1-S5:

- Figure S1: Sensitivity of the GOTM 1D model MLD to different water types
- Figure S2: Longitudinal and interannual variability of the buoyancy flux and wind stress
- Figure S3: Mixed layer depth comparison between observation and 1D GOTM
- Figure S4: Mixed layer depth comparison between observation and 3D MOM4p1-TOPAZ
- Figure S5: Vertical integration of the weekly climatology of  $N^2$  and its haline, and thermal components for observations, 1D, and 3D models.

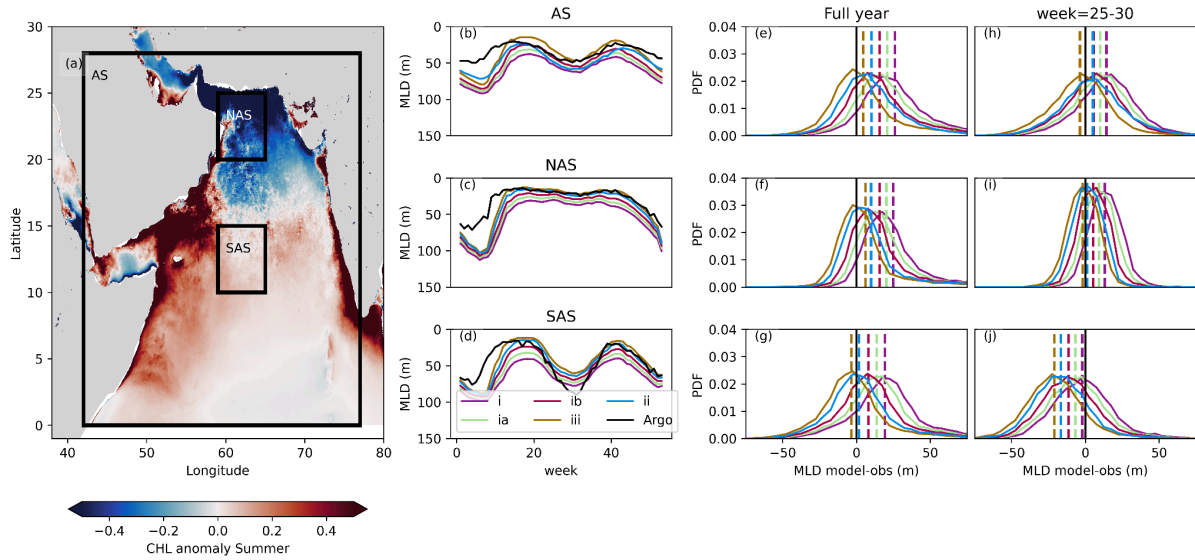

**Figure S1.** (a) Chlorophyll concentration summer climatology anomaly. Boxes mark the Arabian Sea, the Northern Arabian Sea and the Southern Arabian Sea regions used in panels (b-m). (b-m) Sensitivity of the modelled MLD by the GOTM 1D model to Water types. MLD annual time-series for Argo (black) and MLD output by GOTM using 5 different water types between (i, ia, ib, ii, iii) for the whole AS (b), NAS (f), and SAS (g). (h-i-j) Full-year bias distribution for each of the water types compared to the observations per region. (k-l-m) It is the same as (h-i-j) but for only data in weeks 25-30 (summer onset). Water type ii is best at representing shallow MLD. In the SAS during summer less turbid waters (type i) are best at reproducing the MLD.

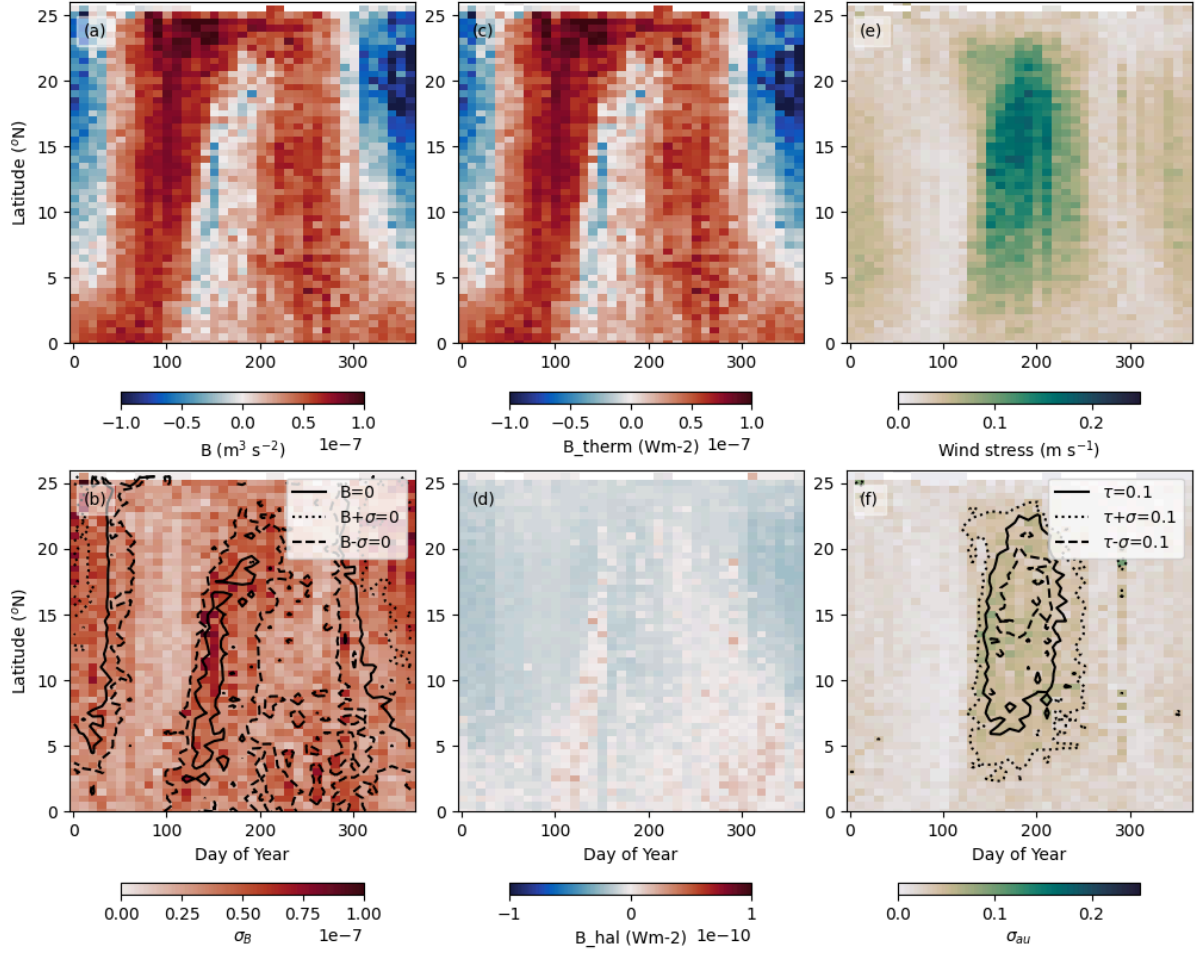

**Figure S2.** Latitudinal histograms of (a) buoyancy flux,  $B$ ; (b) standard deviation of the buoyancy flux; (c) thermal and (d) haline component of the buoyancy flux; (e) wind stress and (f) standard deviation of wind stress. In (b) contours of  $B=0$  (solid) and  $B=0$  for  $\pm 1$ std (dotted and dashed). In (f) contours of  $0.1$  wind stress (solid) and  $0.1 \pm 1$ std (dotted and dashed).

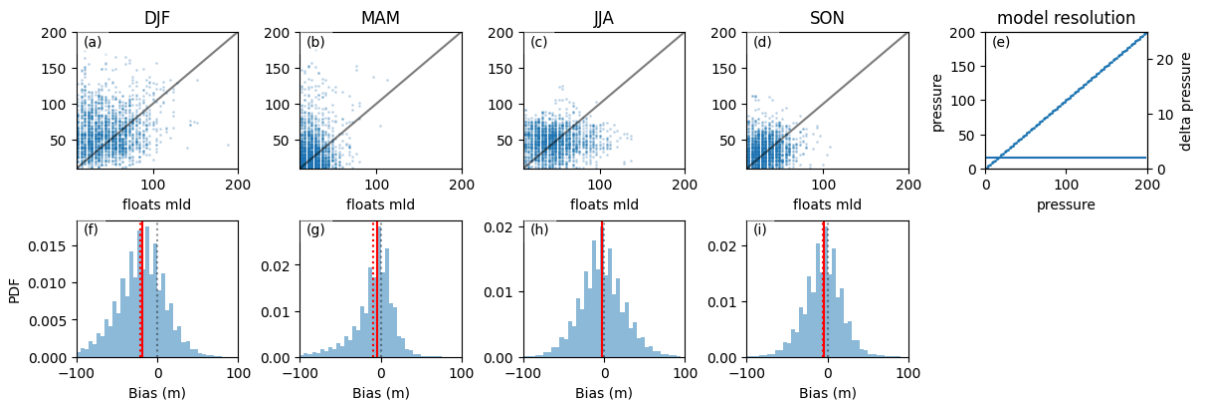

**Figure S3.** Mixed layer depth comparison between observation and 1D GOTM. a-d) Scatter of the observed MLD vs. the 1D modeled MLD per season. e) Scatter of the 1D model vertical resolution (regular grid of 2m (delta pressure) in the upper 200m). f-i) Histograms of the difference between the observed MLD and the 1D modeled MLD. The mean and median of the difference per season are respectively: DJF:  $-21 \pm 30$  m, -19 m; MAM:  $-9 \pm 26$  m, -5 m; JJA:  $-3 \pm 28$  m, -3 m; and SON:  $-6 \pm 25$  m, -5 m.

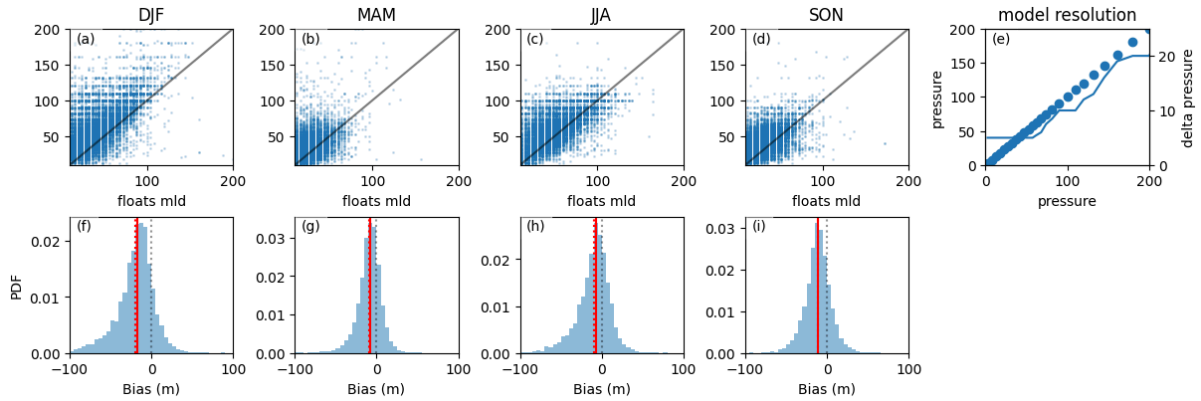

**Figure S4.** Mixed layer depth comparison between observation and 3D MOM4p1-TOPAZ. a-d) Scatter of the observed MLD vs. the 3D modeled MLD per season. e) Scatter of the 3D model vertical resolution. Grid size is represented by delta pressure variable. f-i) Histograms of the difference between the observed MLD and the 3D modeled MLD. The mean and median of the difference per season are respectively: DJF:  $-20 \pm 24$  m, -17 m; MAM:  $-9 \pm 16$  m, -8 m; JJA:  $-10 \pm 20$  m, -8 m; and SON:  $-11 \pm 17$  m, -11 m.

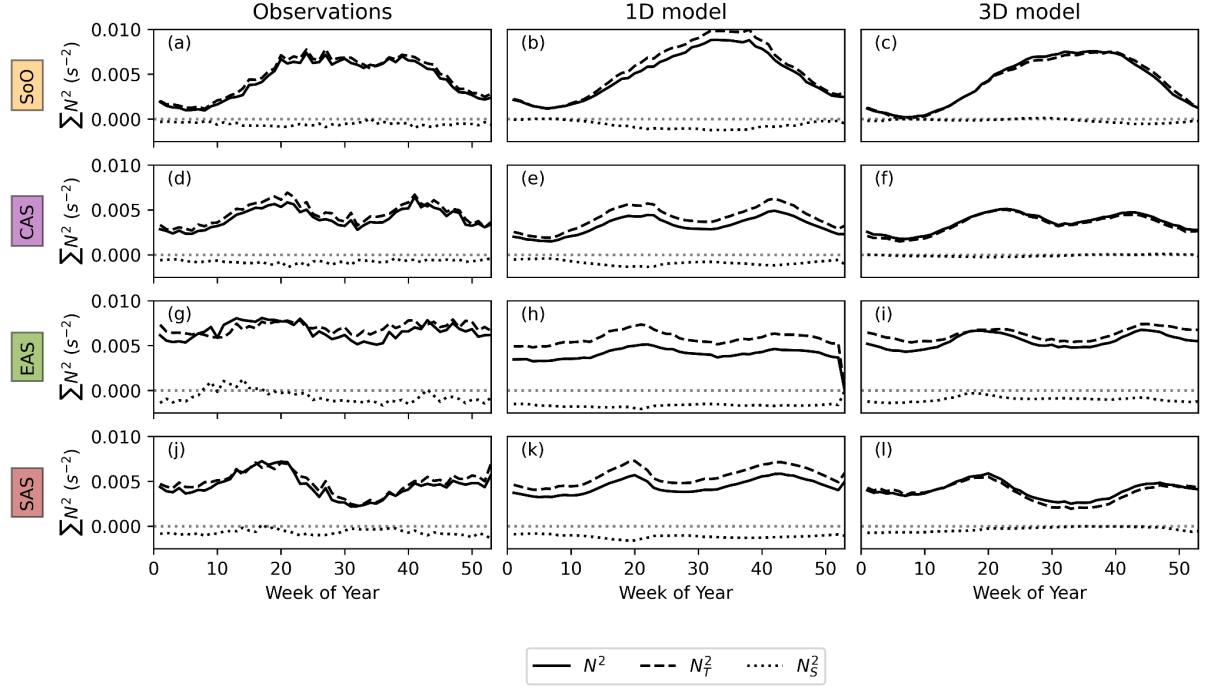

**Figure S5. Vertical integration of the weekly climatology of  $N^2$  and its haline, and thermal components for observations, 1D, and 3D models.** The vertical integral of stratification ( $N^2$  - solid), the thermal component of the stratification ( $N_T^2$  - dashed), and the haline component of the stratification ( $N_S^2$  - dotted) for the observations (first column), 1D model (second column) and 3D model (third column). Each row corresponds to the locations of the different case studies in Figure 8.
